# Supplementary material
Source: HighWire-hosted journal article supplement (https://adc.bmj.com/content/104/6/522)
Supplement: inline-supplementary-material-1 [file inline-supplementary-material-1.pdf]

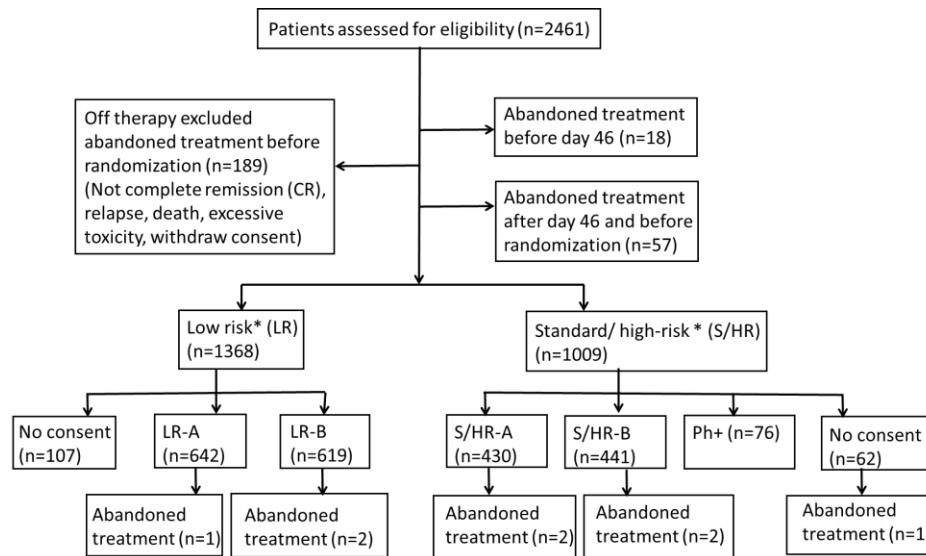

**Figure S1: Treatment flow chart. Patients with Philadelphia chromosome were assigned to standard-/ high-risk arm A of the studies (S/HR)-A without randomization in maintenance phase.**

\* MRD revised risk.
