# Supplementary material
Source: HighWire-hosted journal article supplement (https://adc.bmj.com/content/104/6/522)
Supplement: inline-supplementary-material-2 [file inline-supplementary-material-2.pdf]

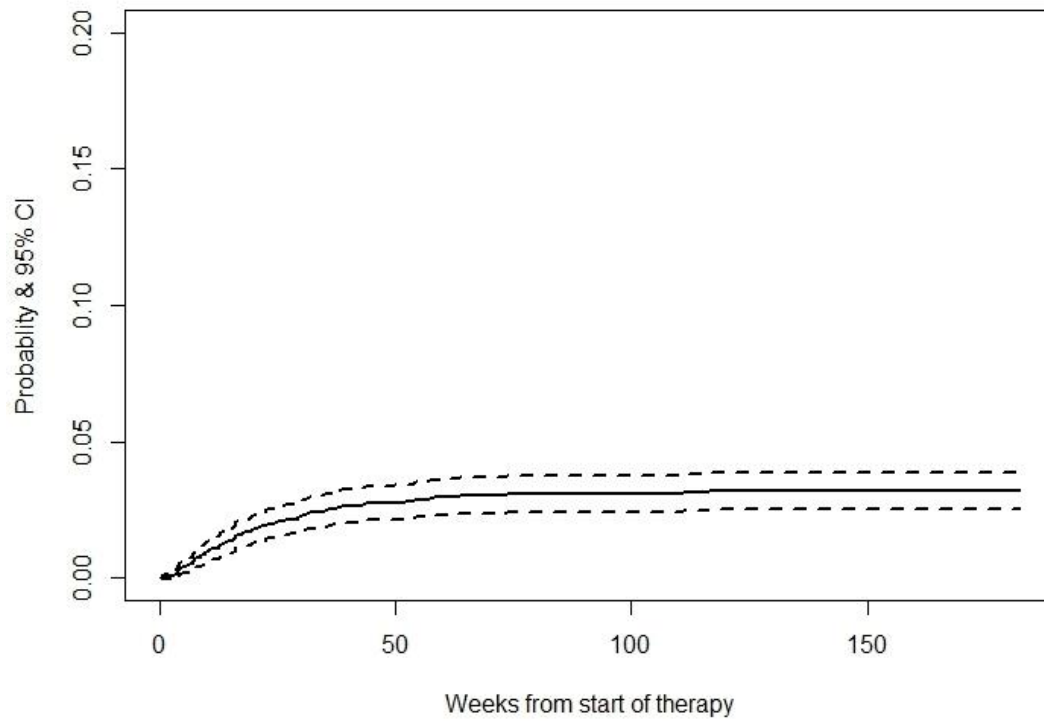

**Figure S2: Cumulative risk of treatment abandonment since therapy initiation. Dashed lines indicate 95% confidence intervals.**
