# Supplementary material
Source: HighWire-hosted journal article supplement (https://adc.bmj.com/content/104/6/522)
Supplement: inline-supplementary-material-3 [file inline-supplementary-material-3.pdf]

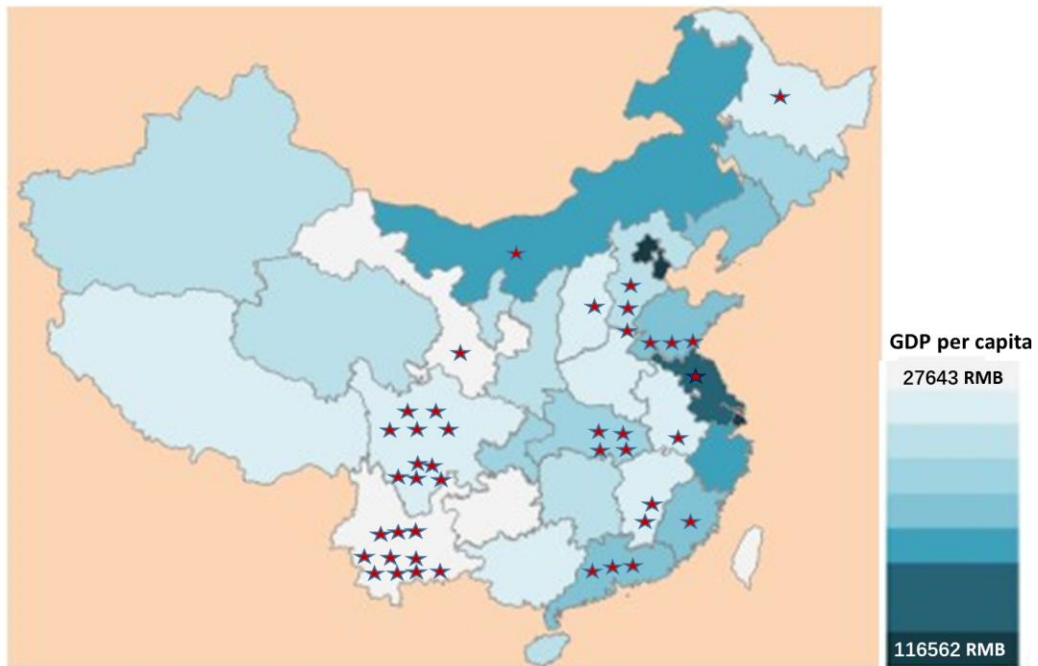

★ Abandoned treatment due to economic difficulty (N=42)

**Figure S3: Geographic distribution of 42 patients who abandoned treatment due to economic difficulties. The administrative regions shown were characterized by wide variability in disposal income per capita.**
